# Supplementary material for: Origin of photocatalytic activity enhancement in Pd/Pt-deposited anatase N-TiO2 – experimental insights and DFT study of the (001) surface
Source: Royal Society of Chemistry journal article supplement (doi:10.1039/d0cp03186k), 2020-01-01

### Supplementary data 1.

*XRD pattern of N-doped TiO<sub>2</sub> a) before b) after noble metal deposition at the surface.*

Reproduced from Ref. (28) with permission from the PCCP Owner Societies.

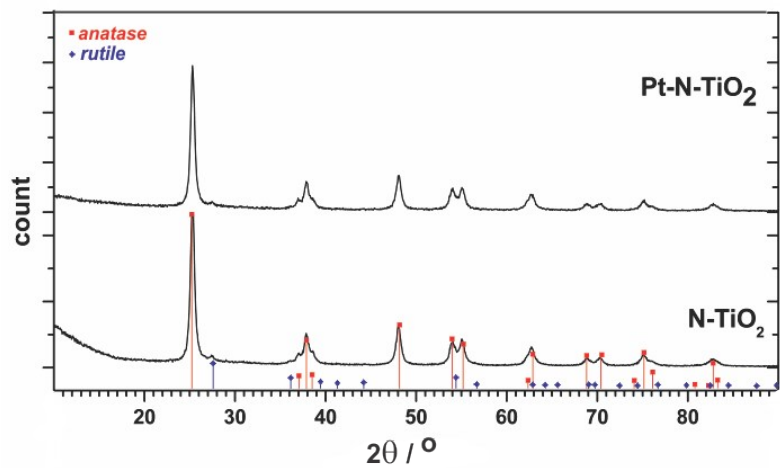

Supplement: d0cp03186k1.pdf [file d0cp03186k1.pdf]
