# Supplementary material for: Origin of photocatalytic activity enhancement in Pd/Pt-deposited anatase N-TiO2 – experimental insights and DFT study of the (001) surface
Source: Royal Society of Chemistry journal article supplement (doi:10.1039/d0cp03186k), 2020-01-01

### Supplementary data 2.

XPS spectrum N-TiO<sub>2</sub>: N 1s lines and fit; lines ascribed to contribution of 1)interstitial nitrogen 2)substitutional nitrogen 3)chemisorbed nitrogen-containing compounds. Reproduced from Ref. 28 with permission from the PCCP Owner Societies.

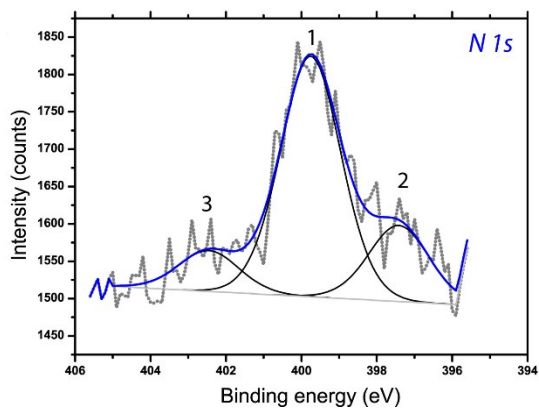

Supplement: d0cp03186k2.pdf [file d0cp03186k2.pdf]
