# Supplementary material for: Origin of photocatalytic activity enhancement in Pd/Pt-deposited anatase N-TiO2 – experimental insights and DFT study of the (001) surface
Source: Royal Society of Chemistry journal article supplement (doi:10.1039/d0cp03186k), 2020-01-01
Supplement: d0cp03186k3.pdf [file d0cp03186k3.pdf]

### Supplementary data 3.

Table 1s: The calculated Löwdin charge ( $\Delta q$ ) referred to the charge of isolated atom:

|                                                        | N     | M     | M2    | O(-N) | O next to M | Ti next to N | Ti next to M |
|--------------------------------------------------------|-------|-------|-------|-------|-------------|--------------|--------------|
| N <sub>int</sub> -TiO <sub>2</sub>                     | -0.26 |       |       | -0.27 |             | 1.59         |              |
| N <sub>subs</sub> -TiO <sub>2</sub>                    | -0.76 |       |       |       |             |              |              |
| Pd@TiO <sub>2</sub>                                    |       | 0.28  |       |       | -0.67       |              | 1.53         |
| Pt@TiO <sub>2</sub>                                    |       | -0.29 |       |       | -0.53       |              | 1.63         |
| Pd <sub>2</sub> @TiO <sub>2</sub>                      |       | 0.23  | 0.24  |       | -0.87       |              | 1.50         |
| Pt <sub>2</sub> @TiO <sub>2</sub>                      |       | -0.34 | -0.24 |       | -0.56       |              | 1.56         |
| Pd@N <sub>int</sub> -TiO <sub>2</sub>                  | -0.37 | 0.38  |       | -0.35 | -0.72       | 1.59         | 1.59         |
| Pd <sup>next</sup> @N <sub>int</sub> -TiO <sub>2</sub> | -0.25 | 0.32  |       | -0.26 | -0.70       | 1.59         | 1.57         |
| Pt@N <sub>int</sub> -TiO <sub>2</sub>                  | -0.19 | -0.31 |       | -0.34 | -0.58       | 1.66         | 1.56         |
| Pd@N <sub>subs</sub> -TiO <sub>2</sub>                 | -0.97 | 0.46  |       |       | -0.72       |              |              |
| Pt@N <sub>subs</sub> -TiO <sub>2</sub>                 | -0.82 | -0.30 |       |       | -0.56       |              |              |
| Pd <sub>2</sub> @N <sub>int</sub> -TiO <sub>2</sub>    | -0.35 | 0.35  | 0.26  | -0.33 | -0.50       | 1.64         | 1.62         |
| Pt <sub>2</sub> @N <sub>int</sub> -TiO <sub>2</sub>    | -0.19 | -0.26 | -0.4  | -0.33 | -0.73       | 1.67         | 1.63         |
